# Supplementary material for: Gadolinium functionalized carbon dots for fluorescence/magnetic resonance dual-modality imaging of mesenchymal stem cells
Source: Royal Society of Chemistry journal article supplement (doi:10.1039/c6tb01422d), 2016-01-01
Supplement: c6tb01422d1.pdf [file c6tb01422d1.pdf]

# *Electronic Supporting Information*

*For*

Gadolinium Functionalized Carbon Dots for Fluorescence/Magnetic  
Resonance Dual-Modality Imaging of Mesenchymal Stem Cells

***Hao Chen,<sup>a</sup> Lina Wang,<sup>bd</sup> Han Fu,<sup>bc</sup> Zhiying Wang,<sup>bd</sup> Yujie Xie,<sup>a</sup> Zhijun Zhang<sup>b\*</sup> and Yu***

***Tang<sup>a\*</sup>***

<sup>a</sup> Key Laboratory of Nonferrous Metal Chemistry and Resources Utilization of Gansu Province, State Key Laboratory of Applied Organic Chemistry, College of Chemistry and Chemical Engineering, Lanzhou University, Lanzhou 730000, P. R. China, E-mail: tangyu@lzu.edu.cn

<sup>b</sup> Key Laboratory of Nano-Bio Interface, Division of Nanobiomedicine, CAS Center for Excellence in Nanoscience, Suzhou Institute of Nano-Tech and Nano-Bionics, Chinese Academy of Sciences, Suzhou 215123, Jiangsu, China, E-mail: [zjzhang2007@sinano.ac.cn](mailto:zjzhang2007@sinano.ac.cn)

<sup>c</sup> University of Chinese Academy of Sciences, 19 Yuquan Road, Beijing, 100049, China

<sup>d</sup> School of Life Sciences, Shanghai University, 99 Shangda Road, Shanghai 200444, China

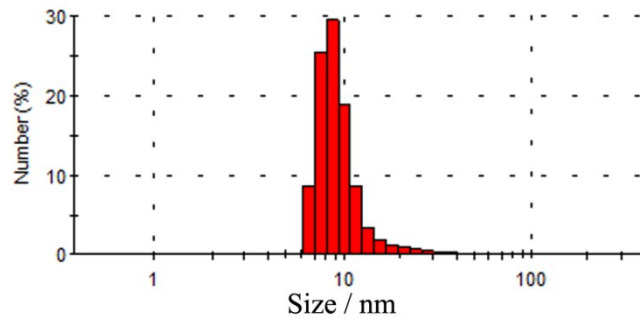

**Figure S1.** Size distribution of Gd-CDs in water determined by DLS (25°C, pH = 7).

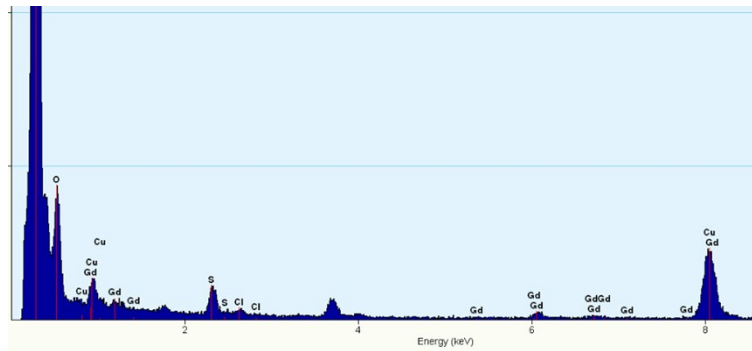

**Figure S2.** EDAX spectrum of Gd-CDs.

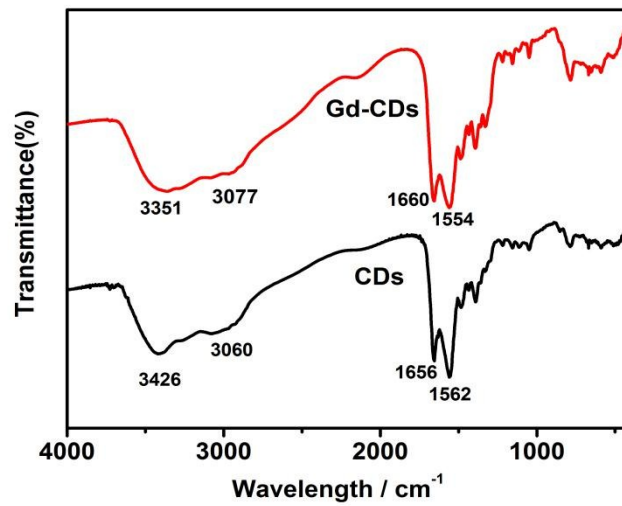

**Figure S3** FTIR spectra of CDs and Gd-CDs (KBr pellet).

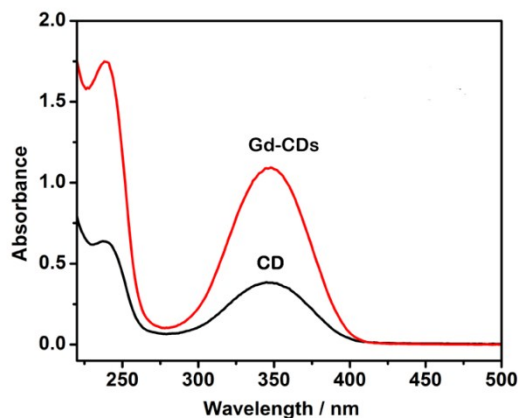

**Figure S4** Absorption spectra of CDs and Gd-CDs in aqueous solution.

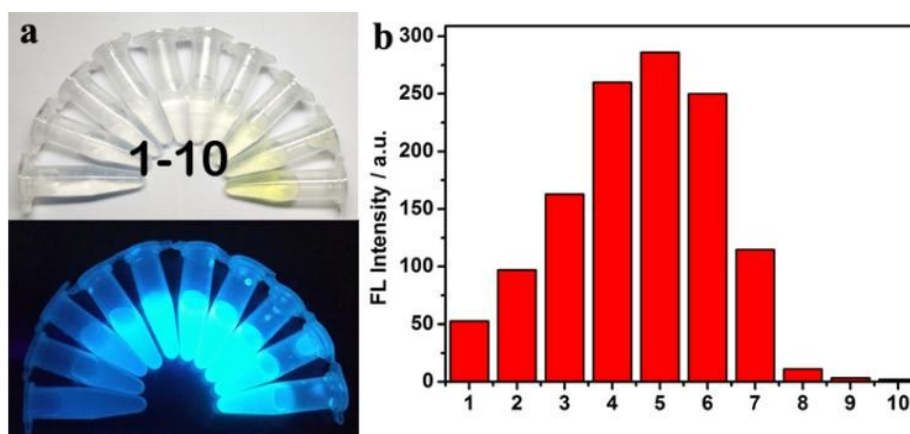

**Figure S5** a) Photographs taken under visible light (left upper) and UV light with a wavelength of 365 nm (left bottom) of Gd-CDs (From 1-10: 0.00625, 0.0125, 0.025, 0.05, 0.1, 0.2, 0.4, 0.8, 1.6, 3.2 mM); b) Fluorescence intensity of Gd-CDs at different concentrations.

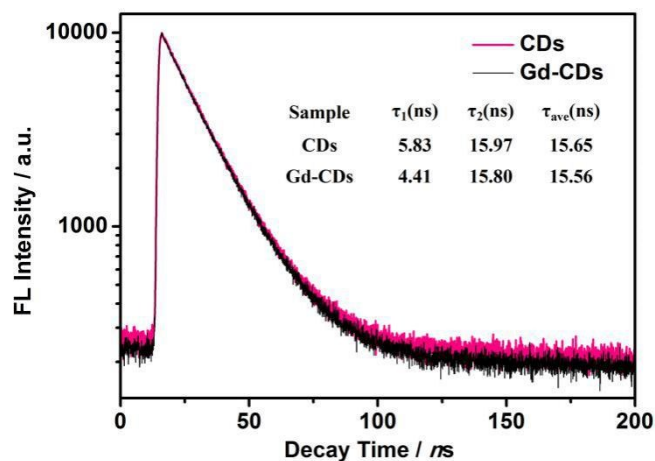

**Figure S6** Fluorescence decay profiles of CDs and Gd-CDs. The average lifetime of CDs is 15.65 ns and contains two lifetime components: 5.83 ns (~3.12%) and 15.97 ns (~96.88%). The average lifetime of Gd-CDs is 15.56 ns and contains two lifetime components: 4.41 ns (~2.10%) and 15.80 ns (97.90%) (the delay time at 450 nm emission). The fluorescence decay curves determined at the excitation of 360 nm were both fitted to a double-exponential function, and the

average lifetime was calculated according to  $\langle \tau \rangle = \frac{\sum A_i \tau_i^2}{\sum A_i \tau_i}$ .

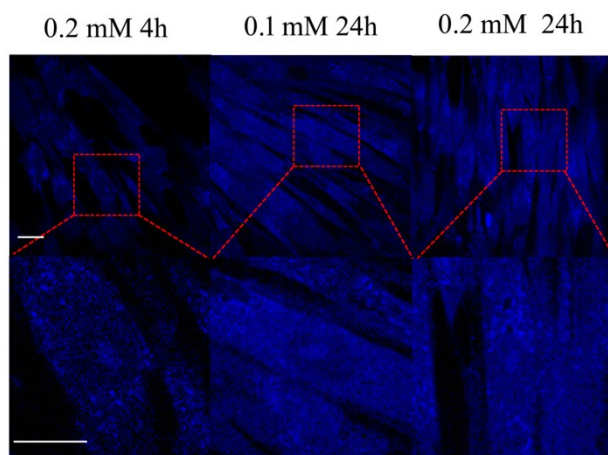

**Figure S7** Confocal fluorescence images of hMSCs incubated with Gd-CDs. Scale bars: 30  $\mu$ m.

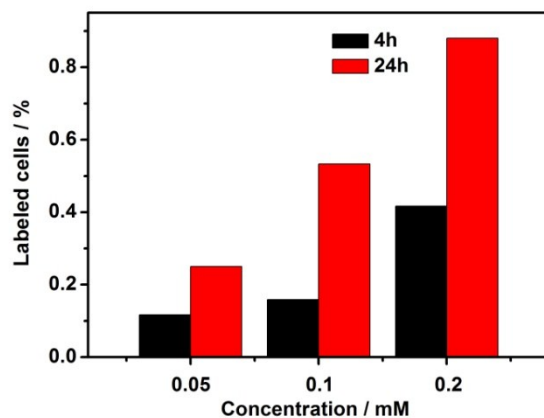

**Figure S8** The percentage of labeled hMSC after incubating with appropriate medium contain 0.05, 0.1, 0.2 mM of Gd-CDs for different time.

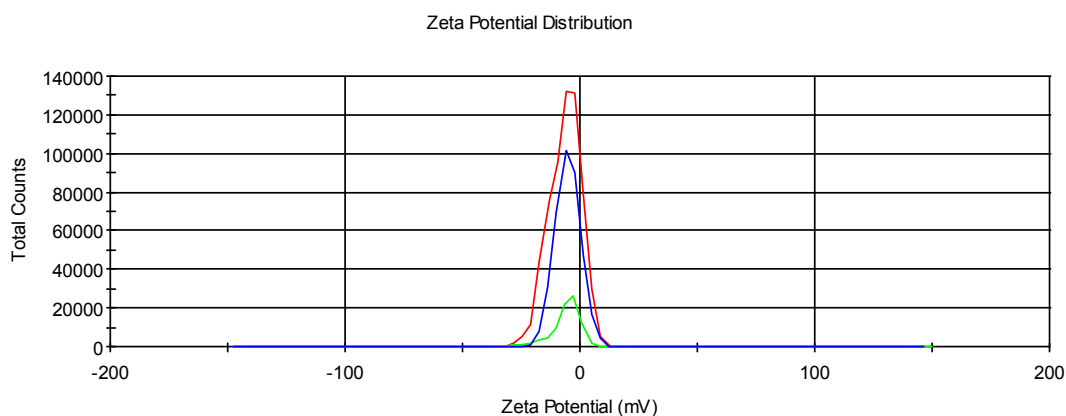

**Figure S9** The zeta potential of Gd-CDs (25°C).

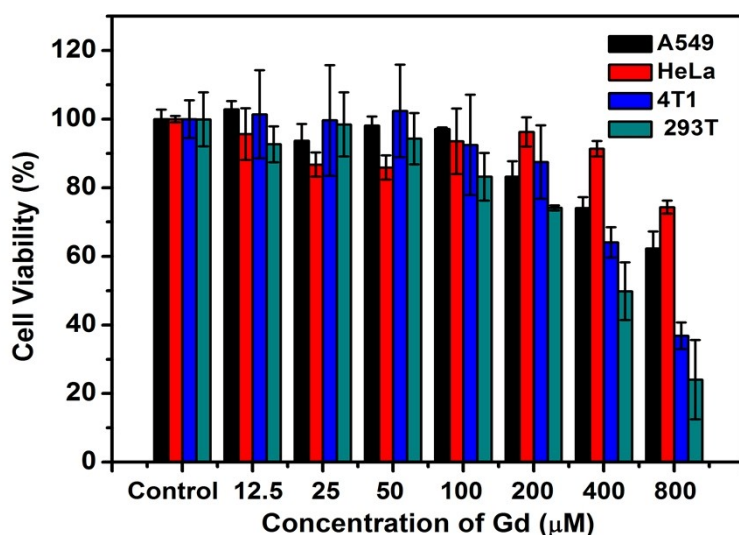

**Figure S10** Relative cell viability of four different types of cell lines (HeLa, 4T1, A549, 293T) treated with Gd-CDs at different concentrations for 24h.

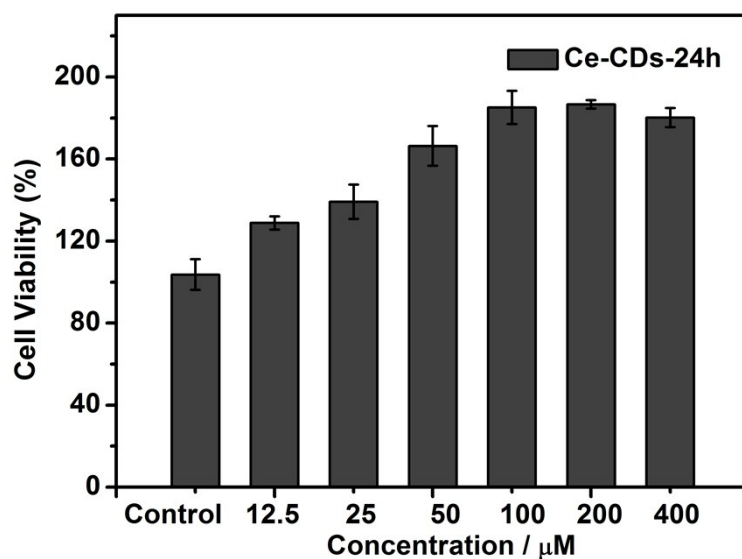

**Figure S11** Relative cellular viability of hMSCs incubated with Ce-CDs at different concentrations for 24h.

**Table S1** The imaging modalities and proliferation effect of a variety of materials to hMSC.

| materials            | Imaging modalities               | Proliferation effect | Reference                              |
|----------------------|----------------------------------|----------------------|----------------------------------------|
| PVA-Gd               | $T_1$ MR                         | No                   | Bioconjugate Chem. 2014, 25, 1243-1251 |
| Ln-nanorods          | FL Imaging                       | differentiation      | J. Mater. Chem. B, 2014, 2, 3609-3617  |
| Gd@US-tube           | $T_1$ MR                         | No                   | Nanoscale, 2015,7, 12085-12091         |
| Ag <sub>2</sub> S QD | NIR FL Imaging                   | No                   | Adv. Funct. Mater. 2014, 24, 2481-2488 |
| AuNP & AuNR          | ultrasound/photoacoustic imaging | No                   | J. Mater. Chem. B, 2014, 2, 8220-8230  |
| FPMNs                | $T_2$ & FL                       | No                   | J. Mater. Chem., 2008, 18, 4402-4407   |
| Gd-CDs               | $T_1$ MR & FL                    | Yes                  | This work                              |
